# Supplementary material
Source: PubMed Central journal article supplement (PMC8686685)
Supplement: NIHMS1755600-supplement-Supp_Figs.pdf [file NIHMS1755600-supplement-Supp_Figs.pdf]

## Supplemental figures

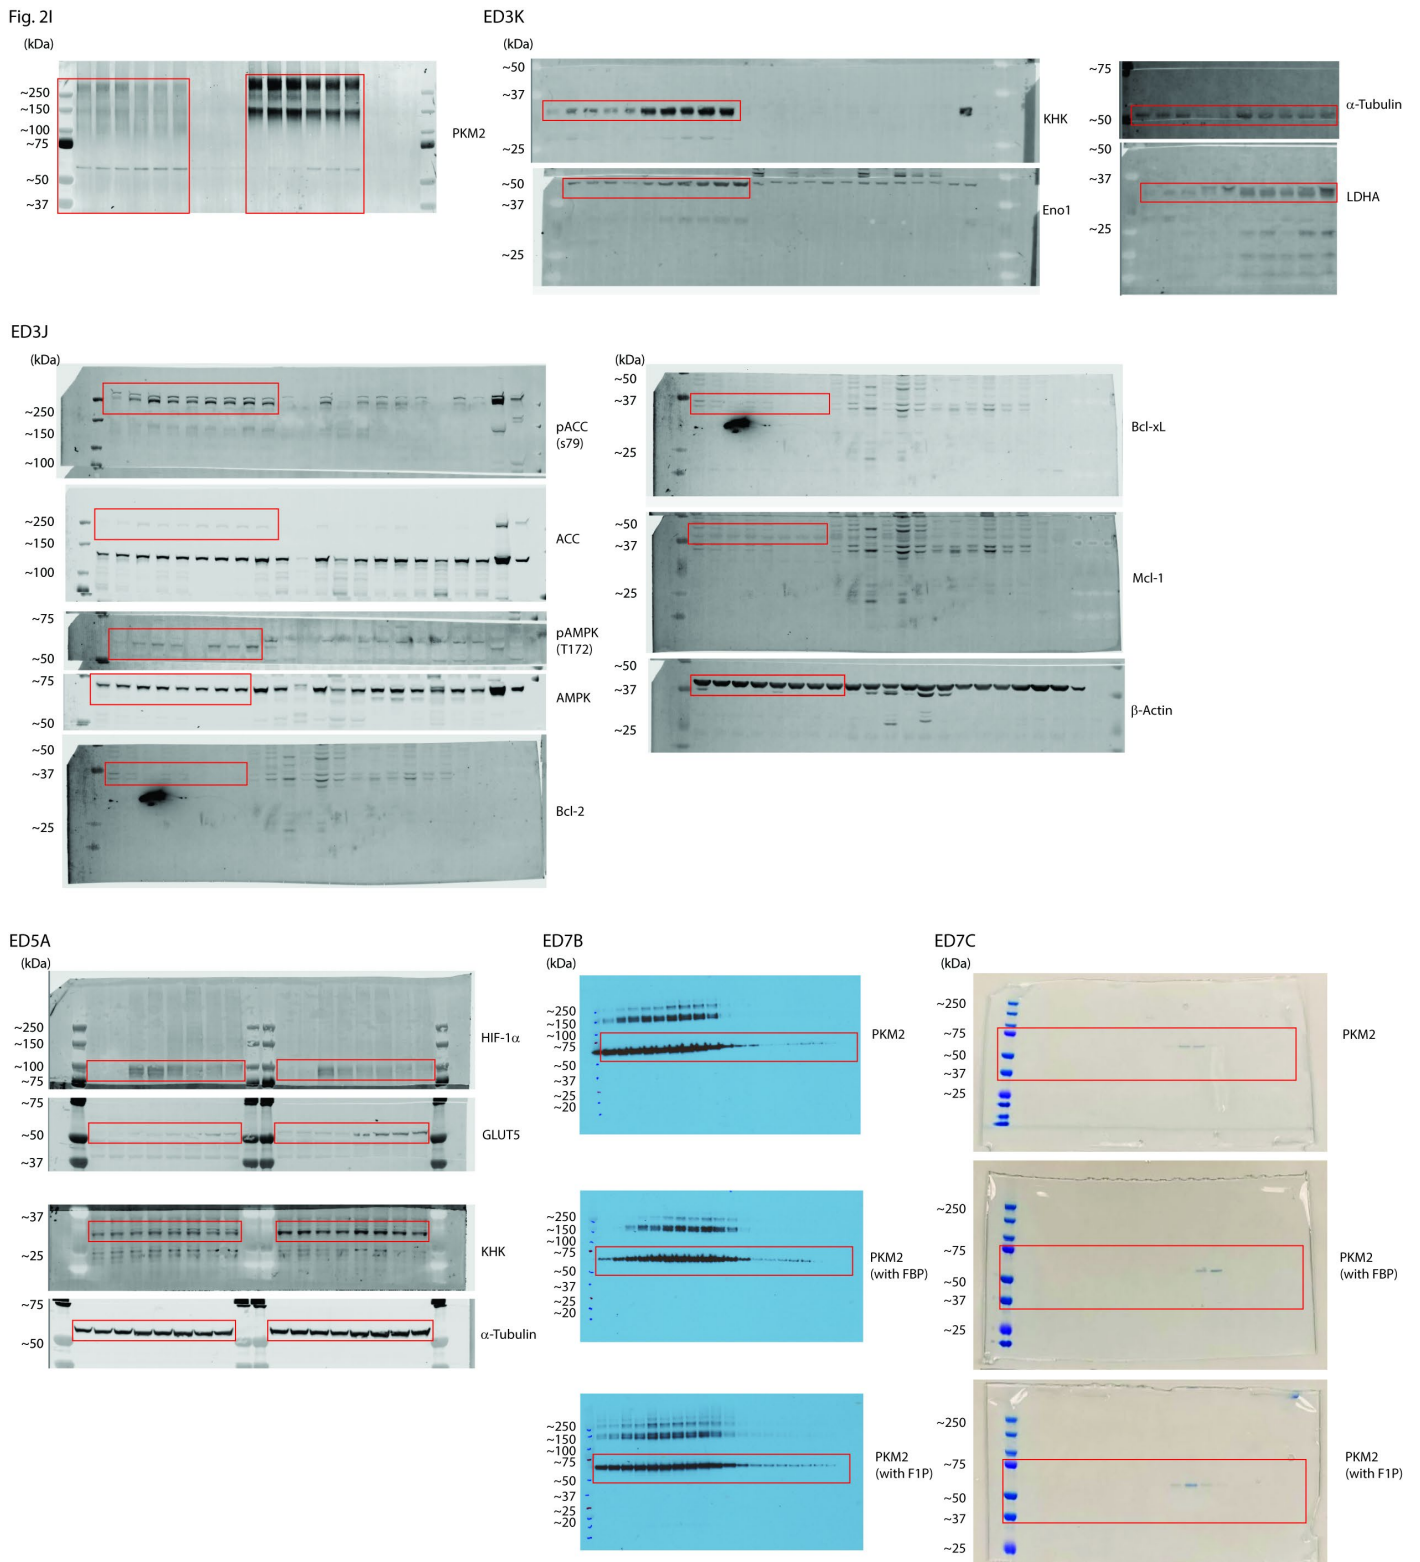

**Fig. S1. Uncropped images**

Uncropped immunoblots for figure 2I and extended data through 7B, as well as uncropped coomassie images for extended data 7C. Red box indicates the crop area for the corresponding figure. In all cases where loading controls (b-Actin or a-Tubulin) were blotted, these were performed on the same membrane as the other displayed targets.

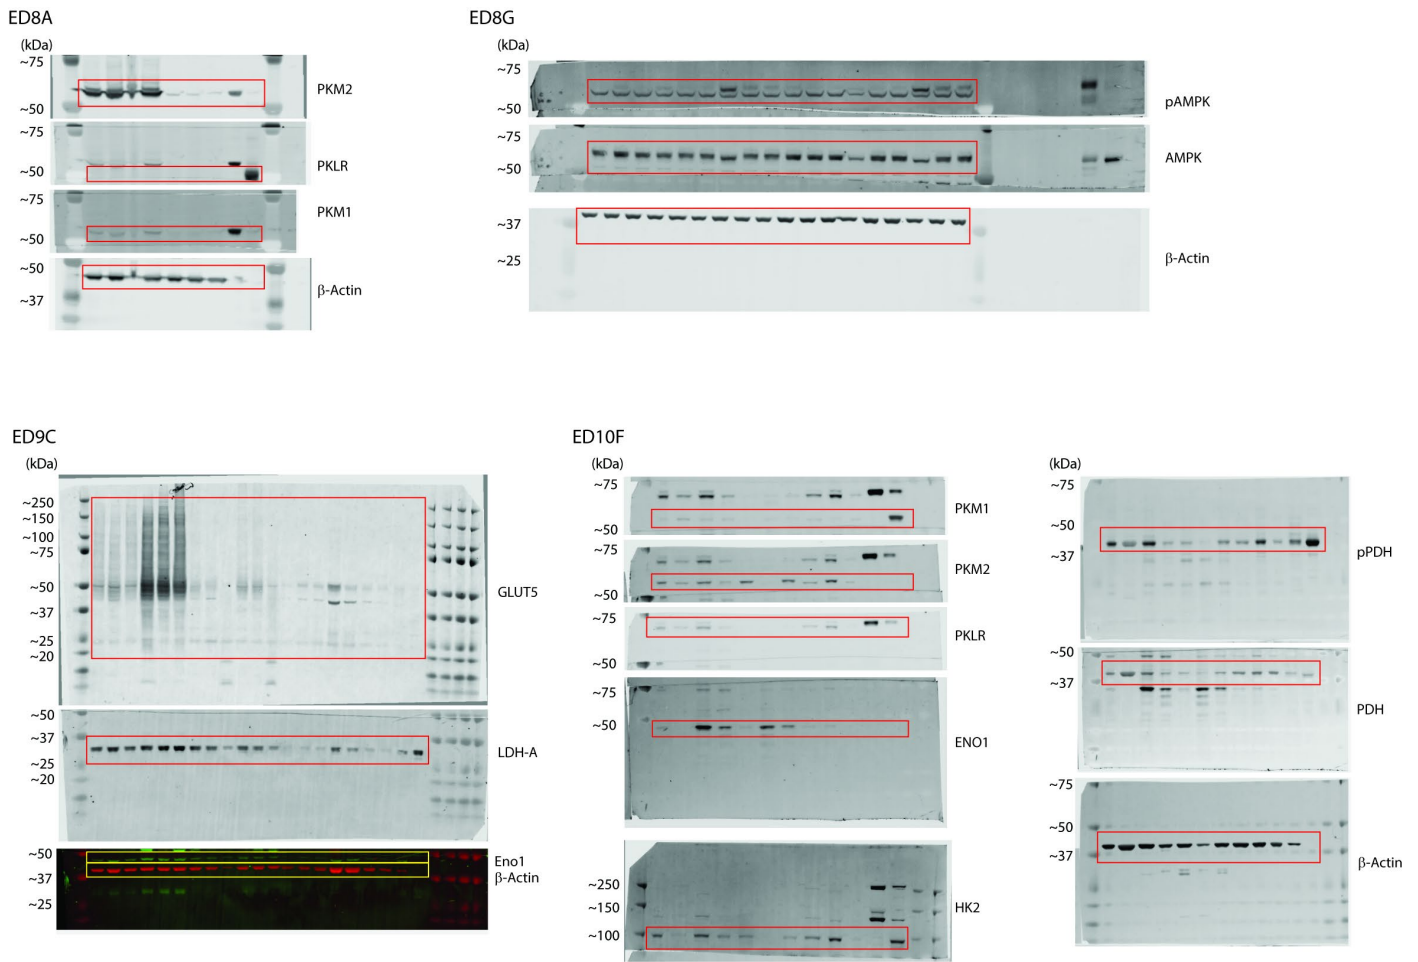

**Fig. S2. Uncropped images**

Uncropped immunoblots for extended data 8A through 10F. Red box indicates the crop area for the corresponding figure. In all cases where loading controls (b-Actin or a-Tubulin) were blotted, these were performed on the same membrane as the other displayed targets.

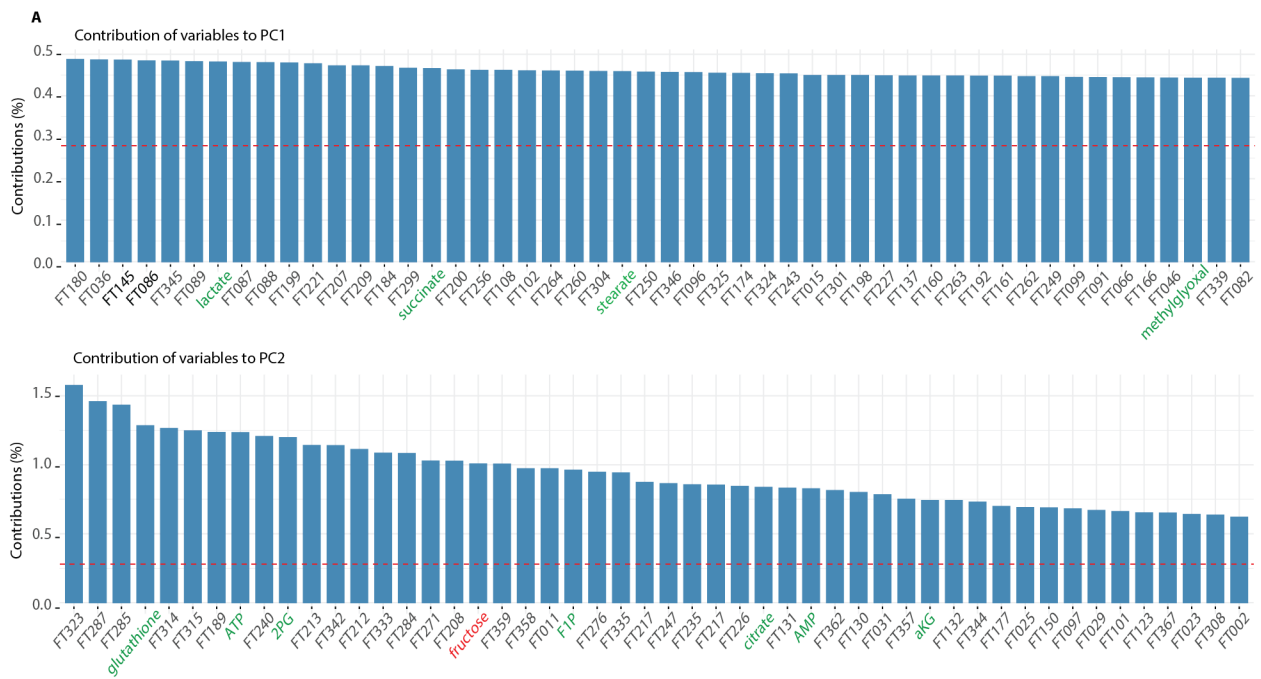

**Fig. S3. HCT116 LC-MS metabolomics loadings**

Loading plots for PC1 and PC2 with specific identified metabolites highlighted.

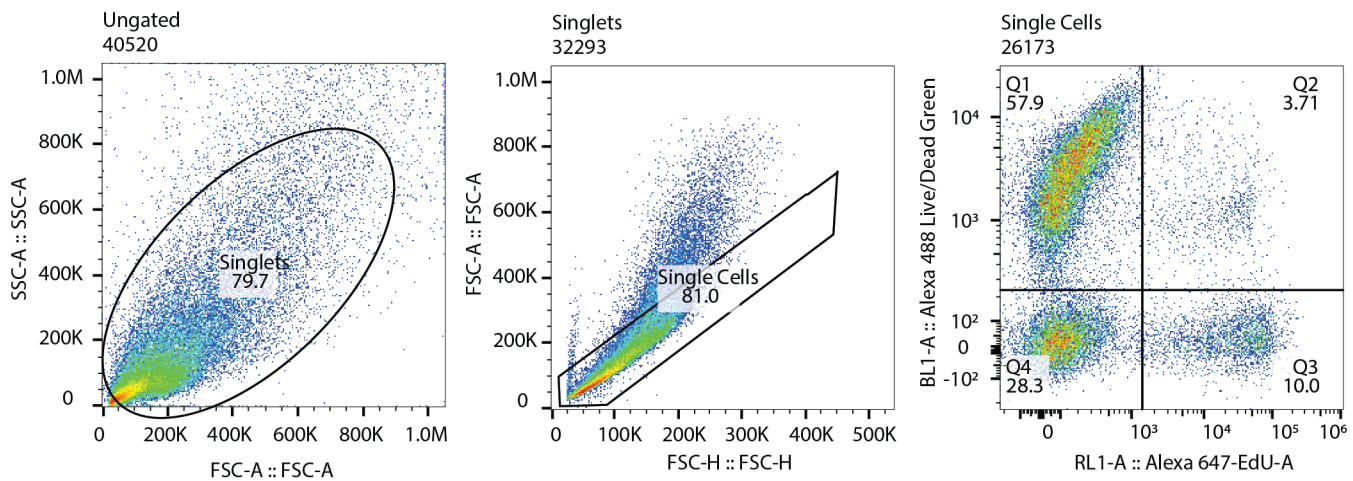

**Fig. S4. Gating strategy for assessing organoid viability and proliferation.**

| Product #                | D17011901                |             | D19090601       |             | D19090602               |             |
|--------------------------|--------------------------|-------------|-----------------|-------------|-------------------------|-------------|
|                          | <i>Match Purina 5053</i> |             | <i>High-Fat</i> |             | <i>High-Fat/Sucrose</i> |             |
|                          | gm%                      | kcal%       | gm%             | kcal%       | gm%                     | kcal%       |
| Protein                  | 23.4                     | 25          | 28.0            | 25          | 28.0                    | 25          |
| Carbohydrate             | 59.9                     | 62          | 36.0            | 30          | 36.0                    | 30          |
| Fat                      | 5.4                      | 13          | 22.4            | 45          | 22.4                    | 45          |
| Total                    |                          | 100         |                 | 100         |                         | 100         |
| kcal/gm                  | 3.76                     |             | 4.51            |             | 4.51                    |             |
| <b>Ingredient</b>        | <b>gm</b>                | <b>kcal</b> | <b>gm</b>       | <b>kcal</b> | <b>gm</b>               | <b>kcal</b> |
| Casein                   | 250                      | 1000        | 250             | 1000        | 250                     | 1000        |
| L-Cystine                | 3.8                      | 15.2        | 3.8             | 15.2        | 3.8                     | 15.2        |
| Corn Starch              | 381                      | 1524        | 57              | 228         | 0                       | 0           |
| Maltodextrin 10          | 110                      | 440         | 110             | 440         | 0                       | 0           |
| Sucrose                  | 0                        | 0           | 0               | 0           | 291                     | 1164        |
| Dextrose                 | 124                      | 496         | 124             | 496         | 0                       | 0           |
| Cellulose, BW200         | 75                       | 0           | 75              | 0           | 75                      | 0           |
| Inulin                   | 25                       | 37.5        | 25              | 37.5        | 25                      | 37.5        |
| Soybean Oil              | 59                       | 531         | 59              | 531         | 59                      | 531         |
| Lard                     | 0                        | 0           | 144             | 1296        | 144                     | 1296        |
| Mineral Mix S10026       | 10                       | 0           | 10              | 0           | 10                      | 0           |
| Dicalcium Phosphate      | 13                       | 0           | 13              | 0           | 13                      | 0           |
| Calcium Carbonate        | 5.5                      | 0           | 5.5             | 0           | 5.5                     | 0           |
| Potassium Citrate, 1 H2O | 16.5                     | 0           | 16.5            | 0           | 16.5                    | 0           |
| Vitamin Mix V10001       | 10                       | 40          | 10              | 40          | 10                      | 40          |
| Choline Bitartrate       | 2                        | 0           | 2               | 0           | 2                       | 0           |
| Yellow Dye #5, FD&C      | 0.025                    | 0           | 0.05            | 0           | 0                       | 0           |
| Red Dye #40, FD&C        | 0                        | 0           | 0               | 0           | 0.05                    | 0           |
| Blue Dye #1, FD&C        | 0.025                    | 0           |                 | 0           | 0                       | 0           |
| <b>Total</b>             | <b>1084.85</b>           | <b>4084</b> | <b>904.85</b>   | <b>4084</b> | <b>904.85</b>           | <b>4084</b> |

**Table S1.**

Custom diet compositions for the sucrose-free control (D17011901), High-Fat (D19090601), and High-Fat/Sucrose (D19090602) diets.
